# Supplementary material for: Genome-wide identification and characterization of BASIC PENTACYSTEINE transcription factors and their binding motifs in coconut palm
Source: Front Plant Sci. 2024 Dec 10;15:1491139. doi: 10.3389/fpls.2024.1491139 (PMC11666369; doi:10.3389/fpls.2024.1491139)
Supplement: Supplementary file 2 [file Table2.xlsx]

## Sheet: Table S2
Table S2 Primers used for vector construction of CnBPCs.
Primer name	Enzyme used	primer sequence (Enzyme sequence in red, the upstream sequence is homologous segment corresponding to the vector)	GeneID	amplicon(bp)	assay
pGFP-CnBPC3-F	SalI	CTGTTGATACATATGCCCGTCGACATGGATGACGATGGGG	AZ04G0080170	813bp	Subcellular location/Over-expression vector
pGFP-CnBPC3-R	KpnI	CTTGCTCACCATGGATCCGGTACCCCTAATTGTCACAAACTTGTT
pGFP-CnBPC1-F	SalI	CTGTTGATACATATGCCCGTCGACATGGATGATGATGGGGG	AZ09G0192220	834bp	Subcellular location/Over-expression vector
pGFP-CnBPC1-R	KpnI	CTTGCTCACCATGGATCCGGTACCCCTGATAGTCACAAACTTATTGG
pGFP-CnBPC5-F	SalI	CTGTTGATACATATGCCCGTCGACATGGACGACTGTCGACCT	AZ13G0243450	1029bp	Subcellular location/Over-expression vector
pGFP-CnBPC5-R	KpnI	CTTGCTCACCATGGATCCGGTACCCTTGATAGTGATGTAGCGATTT
pGFP-CnBPC6A-F	SalI	CTGTTGATACATATGCCCGTCGACATGGATGACAGTGGGCA	AZ02G0037830	1053bp	Subcellular location/Over-expression vector
pGFP-CnBPC6A-R	KpnI	CTTGCTCACCATGGATCCGGTACCCTTGATTGTGATATAACGATTTG
pGFP-CnBPC7-F	SalI	CTGTTGATACATATGCCCGTCGACATGGATGGAAGGGGAAGA	AZ02G0043590	810bp	Subcellular location/Over-expression vector
pGFP-CnBPC7-R	KpnI	CTTGCTCACCATGGATCCGGTACCCTTGATTGTGACAAACTTATTAGT
pGFP-CnBPC4-F	SalI	CTGTTGATACATATGCCCGTCGACATGCAAATGCAGATAGATGAC	AZ11G0209600	1035bp	Subcellular location/Over-expression vector
pGFP-CnBPC4-R	KpnI	CTTGCTCACCATGGATCCGGTACCCTTAATGGTGATGTAGCGATT
pGFP-CnBPC2-F	SalI	CTGTTGATACATATGCCCGTCGACATGGATGACGATGGGGGAT	AZ15G0262690	831bp	Subcellular location/Over-expression vector
pGFP-CnBPC2-R	KpnI	CTTGCTCACCATGGATCCGGTACCCCTGATAGTCACAAACTTGTTGG
AD-CnBPC3-F	EcoRI	ATGGCCATGGAGGCCAGTGAATTCATGGATGACGATGGGG	AZ04G0080170	813bp	Y1H(linked to pGADT7 vector)
AD-CnBPC3-R	BamHI	CTGCAGCTCGAGCTCGATGGATCCCCTAATTGTCACAAACTTGTT
AD-CnBPC1-F	EcoRI	ATGGCCATGGAGGCCAGTGAATTCATGGATGATGATGGGGG	AZ09G0192220	834bp	Y1H(linked to pGADT7 vector)
AD-CnBPC1-R	BamHI	CTGCAGCTCGAGCTCGATGGATCCCCTGATAGTCACAAACTTATTGG
AD-CnBPC5-F	EcoRI	ATGGCCATGGAGGCCAGTGAATTCATGGACGACTGTCGACCT	AZ13G0243450	1029bp	Y1H(linked to pGADT7 vector)
AD-CnBPC5-R	BamHI	CTGCAGCTCGAGCTCGATGGATCCCTTGATAGTGATGTAGCGATTT
AD-CnBPC6A-F	EcoRI	ATGGCCATGGAGGCCAGTGAATTCATGGATGACAGTGGGCA	AZ02G0037830	1053bp	Y1H(linked to pGADT7 vector)
AD-CnBPC6A-R	BamHI	CTGCAGCTCGAGCTCGATGGATCCCTTGATTGTGATATAACGATTTG
AD-CnBPC7-F	EcoRI	ATGGCCATGGAGGCCAGTGAATTCATGGATGGAAGGGGAAGA	AZ02G0043590	810bp	Y1H(linked to pGADT7 vector)
AD-CnBPC7-R	BamHI	CTGCAGCTCGAGCTCGATGGATCCCTTGATTGTGACAAACTTATTAGT
AD-CnBPC4-F	EcoRI	ATGGCCATGGAGGCCAGTGAATTCATGCAAATGCAGATAGATGAC	AZ11G0209600	1035bp	Y1H(linked to pGADT7 vector)
AD-CnBPC4-R	BamHI	CTGCAGCTCGAGCTCGATGGATCCCTTAATGGTGATGTAGCGATT
AD-CnBPC2-F	EcoRI	ATGGCCATGGAGGCCAGTGAATTCATGGATGACGATGGGGGAT	AZ15G0262690	831bp	Y1H(linked to pGADT7 vector)
AD-CnBPC2-R	BamHI	CTGCAGCTCGAGCTCGATGGATCCCCTGATAGTCACAAACTTGTTGG
pLUC-GA3-F	KpnI-HindIII	ATCGCATGTGTATCTCTCTAGAA			LUC(linked to pGreenII 0800-LUC)
pLUC-GA3-R	KpnI-HindIII	AGCTTTCTAGAGAGATACACATGCGATGTAC
pLUC-GA11-F	KpnI-HindIII	CTCTCTCTCTCTCTCTCTCTCT			LUC(linked to pGreenII 0800-LUC)
pLUC-GA11-R	KpnI-HindIII	AGCTAGAGAGAGAGAGAGAGAGAGAGGTAC
pHis-CS-0.6kF	EcoRI	CGGAATTCTTCAGTCGTTTTGGATCTTT	AZ07G0160020.1-promoter	634bp	Y1H(linked to pHIS2 vector)
pHis-CS-0.6kF	SacI	GCGAGCTCGCCCTCTTCTCTCTCTTATTAT
pHis-AG1-0.7kF	EcoRI	CGGAATTCCACAAACCAAGAGGGAAGAAT	AZ01G0023710.1-promoter	776bp	Y1H(linked to pHIS2 vector)
pHis-AG1-0.7kR	SacI	GCGAGCTCCTTCTCCGGCCGATCCA
pHis-AG2-0.5kF	EcoRI	CCTTAGAATTCCTAGCGCAC	AZ04G0092990.1-promoter	532bp	Y1H(linked to pHIS2 vector)
pHis-AG2-0.5kR	SacI	GCGAGCTCGACCAGTAATTTAGTGAGCCAT
pHis-STK-1kF	EcoRI	CGGAATTCGTTTTTATTTGAAGCATAACAATCT	AZ12G0230100.1-promoter	1016bp	Y1H(linked to pHIS2 vector)
pHis-STK-1kR	SacI	GCGAGCTCTGTCGGAGTGAGGACCACTG
pHis2-MFT-proF1	EcoRI	TACGACTCACTATAGGGCCGGAATTCCGCTTATGTGGTCTCACG	AZ15G0262410-promoter	promoter:-1到-834	Y1H(linked to pHIS2 vector)
pHis2-MFT-proR1	SacI	ATCGATTCGCGAACGCGTGCGAGCTCGGCTACTAGCTAGTTTAATTCTAGA
pHis2-MFT-proF2	EcoRI	TACGACTCACTATAGGGCCGGAATTCCCTGCCCTCATTTCCAA	AZ15G0262410-promoter	promoter:-835到1645	Y1H(linked to pHIS2 vector)
pHis2-MFT-proR2	SacI	ATCGATTCGCGAACGCGTGCGAGCTCCGTGAGACCACATAAGCGA
BD-CnBPC1-F	EcoRI	CATATGGCCATGGAGGCCGAATTCATGGATGATGATGGGGG	AZ09G0192220	834bp	Y2H(linked to pGBKT7 vector)
BD-CnBPC1-R	BamHI	GCCGCTGCAGGTCGACGGATCCCCTGATAGTCACAAACTTATTGG
AD-CnBPC5-F	EcoRI	CATATGGCCATGGAGGCCGAATTCATGGACGACTGTCGACCT	AZ13G0243450	1029bp	Y2H(linked to pGBKT7 vector)
BD-CnBPC5-R	BamHI	GCCGCTGCAGGTCGACGGATCCCTTGATAGTGATGTAGCGATTT
AD-CnBPC7-F	EcoRI	CATATGGCCATGGAGGCCGAATTCATGGATGGAAGGGGAAGA	AZ02G0043590	810bp	Y2H(linked to pGBKT7 vector)
BD-CnBPC7-R	BamHI	GCCGCTGCAGGTCGACGGATCCCTTGATTGTGACAAACTTATTAGT
